# Supplementary material for: Detrimental effects of duplicate reads and low complexity regions on RNA- and ChIP-seq data
Source: PubMed Central journal article supplement (PMC4597324; doi:10.1186/1471-2105-16-s13-s10), 2015-09-25
Supplement: 1471-2105-16-S13-S10-S7.pdf [file 1471-2105-16-S13-S10-S7.pdf]

# RepeatSoaker effect on DEGs detection

Using adapter trimmed, duplicates removed mouse RNA-seq data, we are investigating the biology of genes removed by RepeatSoaker. That is, What are the properties of the genes lost when removing reads overlapping low complexity regions.

First, we explore overlap among gene lists without RepeatSoaker treatment (remDup\_all) and with RepeatSoaker treatment at different thresholds (remDup\_75 - remDup\_0)

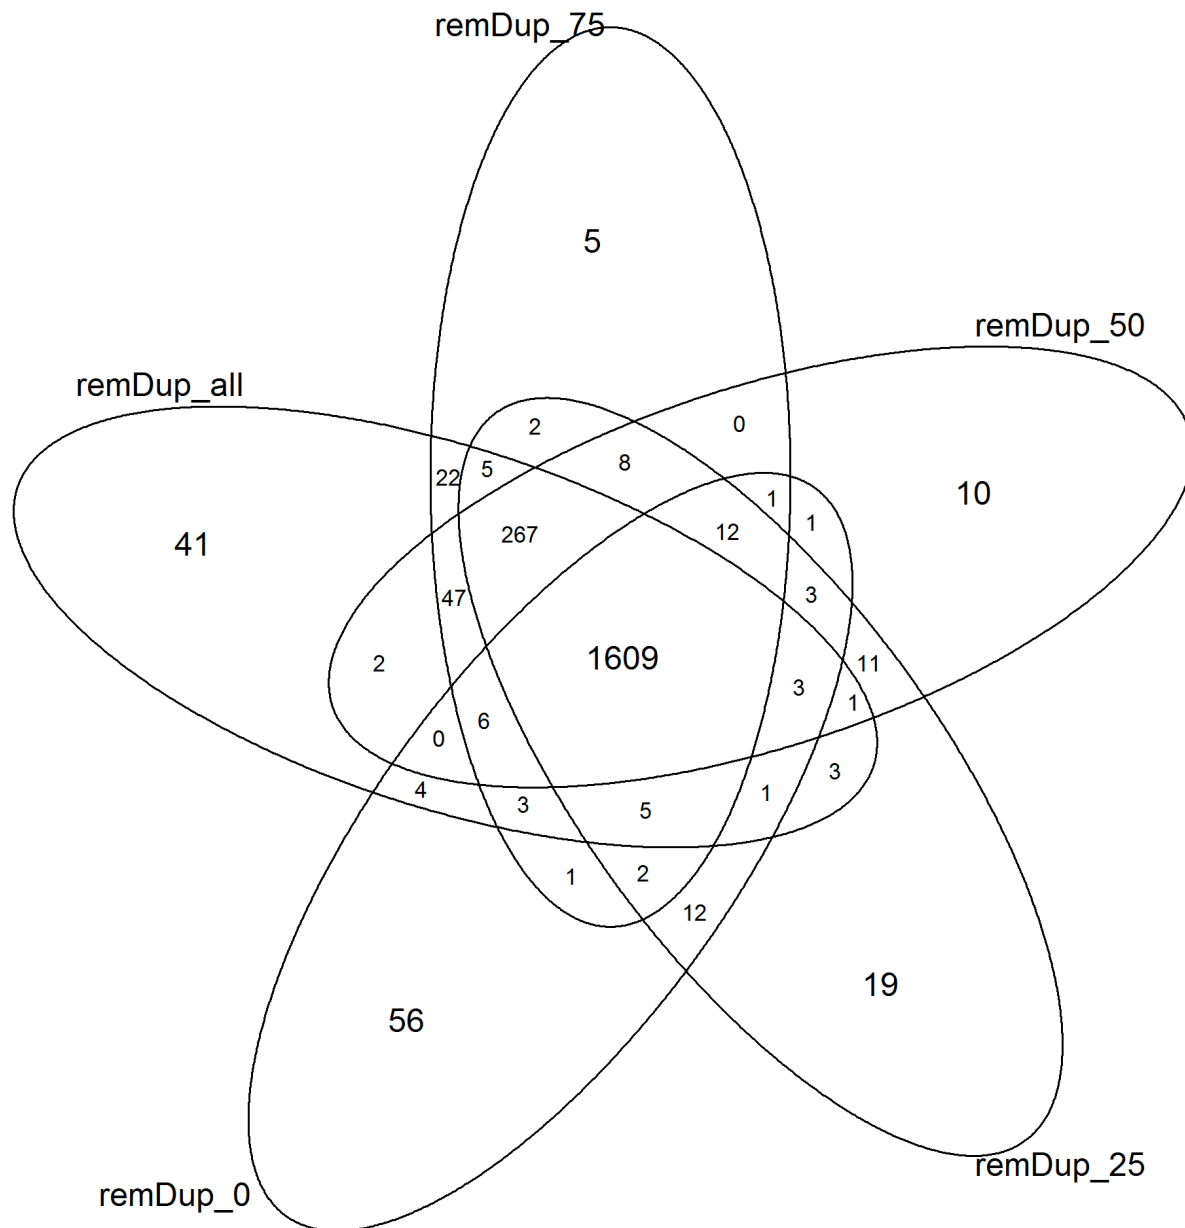

We observe that “RepeatSoaking” diminishes the number of differentially expressed genes. More rigorous soaking (less strict overlap threshold) also increases the number of genes not detected previously (the numbers in the “leaves” of the Venn diagram).

Without RepeatSoaker, we have (all genes in the remDup\_All oval):

```
## Number of differentially expressed PROBES, no
RepeatSoaker: 2019
## Number of differentially expressed GENES, no
RepeatSoaker: 1991
```

Some probes map to multiple genes, hence the discrepancy in counts of probes and genes.

After trimming the data with 0% RepeatSoaker settings, we have (remDup\_0 oval):

```
## Number of differentially expressed PROBES, with  
RepeatSoaker: 1719  
## Number of differentially expressed GENES, with  
RepeatSoaker: 1697
```

## Genes without vs. Genes with RepeatSoaker comparison

We compare enrichment analyses results using genes with and without reads overlapping low complexity regions (remDup\_all vs. remDup\_0).

## KEGG enrichment analysis without RepeatSoaker

```
##  
## KEGG.db contains mappings based on older data because  
## the original resource was removed from the the public  
## domain before the most recent update was produced.  
## This package should now be considered deprecated and  
## future versions of Bioconductor may not have it  
## available. Users who want more current data are  
## encouraged to look at the KEGGREST or reactome.db  
## packages  
##  
## The number of enriched KEGG :35
```

|    | KEGGID | Pvalue    | OddsRatio | ExpCount | Count | Size | Term                                        | p.adj     |
|----|--------|-----------|-----------|----------|-------|------|---------------------------------------------|-----------|
| 1  | 03010  | 7.170e-43 | 15.319    | 12.275   | 73    | 119  | Ribosome                                    | 2.509e-41 |
| 2  | 04510  | 1.069e-05 | 2.321     | 20.631   | 41    | 200  | Focal adhesion                              | 1.872e-04 |
| 3  | 04141  | 8.979e-05 | 2.252     | 17.433   | 34    | 169  | Protein processing in endoplasmic reticulum | 1.048e-03 |
| 4  | 04612  | 2.666e-04 | 2.851     | 8.046    | 19    | 78   | Antigen processing and presentation         | 2.333e-03 |
| 5  | 04916  | 1.095e-03 | 2.352     | 10.315   | 21    | 100  | Melanogenesis                               | 7.664e-03 |
| 6  | 04115  | 1.657e-03 | 2.614     | 7.221    | 16    | 70   | p53 signaling pathway                       | 9.666e-03 |
| 7  | 05200  | 2.245e-03 | 1.626     | 33.525   | 50    | 325  | Pathways in cancer                          | 1.122e-02 |
| 8  | 00330  | 2.710e-03 | 2.791     | 5.570    | 13    | 54   | Arginine and proline metabolism             | 1.185e-02 |
| 9  | 05414  | 3.729e-03 | 2.237     | 9.181    | 18    | 89   | Dilated cardiomyopathy                      | 1.450e-02 |
| 10 | 04144  | 5.795e-03 | 1.679     | 22.694   | 35    | 220  | Endocytosis                                 | 1.859e-02 |
| 11 | 05218  | 5.842e-03 | 2.317     | 7.427    | 15    | 72   | Melanoma                                    | 1.859e-02 |
| 12 | 05215  | 8.602e-03 | 2.080     | 9.181    | 17    | 89   | Prostate cancer                             | 2.466e-02 |
| 13 | 05410  | 9.731e-03 | 2.102     | 8.562    | 16    | 83   | Hypertrophic cardiomyopathy (HCM)           | 2.466e-02 |
| 14 | 04614  | 9.864e-03 | 4.039     | 1.960    | 6     | 19   | Renin-angiotensin system                    | 2.466e-02 |
| 15 | 05211  | 1.240e-02 | 2.159     | 7.324    | 14    | 71   | Renal cell carcinoma                        | 2.893e-02 |
| 16 | 00920  | 1.418e-02 | 5.824     | 1.032    | 4     | 10   | Sulfur metabolism                           | 3.102e-02 |
| 17 | 05222  | 1.513e-02 | 1.982     | 8.974    | 16    | 87   | Small cell lung cancer                      | 3.115e-02 |
| 18 | 04150  | 1.750e-02 | 2.298     | 5.467    | 11    | 53   | mTOR signaling pathway                      | 3.402e-02 |
| 19 | 00030  | 2.069e-02 | 2.918     | 2.888    | 7     | 28   | Pentose phosphate pathway                   | 3.811e-02 |
| 20 | 03013  | 2.223e-02 | 1.615     | 17.330   | 26    | 168  | RNA transport                               | 3.890e-02 |

## KEGG enrichment analysis with RepeatSoaker

## The number of enriched KEGG :33

|    | KEGGID | Pvalue    | OddsRatio | ExpCount | Count | Size | Term                                        | p.adj     |
|----|--------|-----------|-----------|----------|-------|------|---------------------------------------------|-----------|
| 1  | 03010  | 3.754e-41 | 15.122    | 10.685   | 68    | 119  | Ribosome                                    | 1.239e-39 |
| 2  | 04510  | 8.150e-07 | 2.644     | 17.958   | 40    | 200  | Focal adhesion                              | 1.345e-05 |
| 3  | 04612  | 1.150e-05 | 3.582     | 7.004    | 20    | 78   | Antigen processing and presentation         | 1.265e-04 |
| 4  | 04141  | 3.335e-05 | 2.445     | 15.174   | 32    | 169  | Protein processing in endoplasmic reticulum | 2.751e-04 |
| 5  | 04916  | 4.723e-04 | 2.587     | 8.979    | 20    | 100  | Melanogenesis                               | 3.118e-03 |
| 6  | 05200  | 1.973e-03 | 1.680     | 29.182   | 45    | 325  | Pathways in cancer                          | 9.961e-03 |
| 7  | 04150  | 2.113e-03 | 3.007     | 4.759    | 12    | 53   | mTOR signaling pathway                      | 9.961e-03 |
| 8  | 04614  | 5.009e-03 | 4.716     | 1.706    | 6     | 19   | Renin-angiotensin system                    | 1.720e-02 |
| 9  | 05414  | 5.212e-03 | 2.255     | 7.991    | 16    | 89   | Dilated cardiomyopathy                      | 1.720e-02 |
| 10 | 05215  | 5.212e-03 | 2.255     | 7.991    | 16    | 89   | Prostate cancer                             | 1.720e-02 |
| 11 | 05410  | 6.396e-03 | 2.268     | 7.453    | 15    | 83   | Hypertrophic cardiomyopathy (HCM)           | 1.919e-02 |
| 12 | 04144  | 7.369e-03 | 1.699     | 19.754   | 31    | 220  | Endocytosis                                 | 2.026e-02 |
| 13 | 04020  | 8.579e-03 | 1.767     | 15.983   | 26    | 178  | Calcium signaling pathway                   | 2.178e-02 |
| 14 | 04910  | 1.017e-02 | 1.866     | 12.301   | 21    | 137  | Insulin signaling pathway                   | 2.383e-02 |
| 15 | 05218  | 1.083e-02 | 2.261     | 6.465    | 13    | 72   | Melanoma                                    | 2.383e-02 |
| 16 | 04360  | 1.248e-02 | 1.855     | 11.762   | 20    | 131  | Axon guidance                               | 2.574e-02 |
| 17 | 03013  | 1.464e-02 | 1.718     | 15.085   | 24    | 168  | RNA transport                               | 2.843e-02 |
| 18 | 04970  | 1.859e-02 | 2.083     | 6.914    | 13    | 77   | Salivary secretion                          | 2.923e-02 |
| 19 | 04512  | 2.011e-02 | 1.994     | 7.722    | 14    | 86   | ECM-receptor interaction                    | 2.923e-02 |
| 20 | 00330  | 2.026e-02 | 2.326     | 4.849    | 10    | 54   | Arginine and proline metabolism             | 2.923e-02 |

## GO enrichment analysis without RepeatSoaker

## The number of enriched GO :2035

|    | GOBPID     | Pvalue    | OddsRatio | ExpCount | Count | Size  | Term                                          | p.adj     |
|----|------------|-----------|-----------|----------|-------|-------|-----------------------------------------------|-----------|
| 1  | GO:0008152 | 3.949e-69 | 2.348     | 714.5    | 1074  | 9209  | metabolic process                             | 8.037e-66 |
| 2  | GO:0044237 | 1.116e-68 | 2.358     | 601.0    | 951   | 7747  | cellular metabolic process                    | 1.135e-65 |
| 3  | GO:0044238 | 2.303e-68 | 2.349     | 615.5    | 966   | 7933  | primary metabolic process                     | 1.562e-65 |
| 4  | GO:0071704 | 2.298e-67 | 2.328     | 644.6    | 995   | 8309  | organic substance metabolic process           | 1.169e-64 |
| 5  | GO:0009987 | 8.617e-61 | 2.353     | 1055.6   | 1384  | 13606 | cellular process                              | 3.507e-58 |
| 6  | GO:0043170 | 9.411e-56 | 2.200     | 516.3    | 820   | 6655  | macromolecule metabolic process               | 3.192e-53 |
| 7  | GO:0044260 | 1.036e-54 | 2.228     | 450.5    | 741   | 5807  | cellular macromolecule metabolic process      | 3.012e-52 |
| 8  | GO:0071840 | 1.447e-43 | 2.203     | 308.6    | 537   | 3978  | cellular component organization or biogenesis | 3.682e-41 |
| 9  | GO:0019222 | 1.719e-41 | 2.087     | 366.0    | 601   | 4717  | regulation of metabolic process               | 3.886e-39 |
| 10 | GO:1901576 | 8.104e-41 | 2.111     | 336.3    | 563   | 4335  | organic substance biosynthetic process        | 1.649e-38 |
| 11 | GO:0044249 | 9.538e-41 | 2.118     | 330.0    | 555   | 4253  | cellular biosynthetic process                 | 1.765e-38 |
| 12 | GO:0016043 | 1.126e-40 | 2.163     | 298.6    | 516   | 3849  | cellular component organization               | 1.909e-38 |
| 13 | GO:0009058 | 1.707e-40 | 2.097     | 342.1    | 569   | 4409  | biosynthetic process                          | 2.672e-38 |
| 14 | GO:0031323 | 7.132e-40 | 2.125     | 313.4    | 532   | 4040  | regulation of cellular metabolic process      | 1.037e-37 |
| 15 | GO:0010467 | 4.121e-39 | 2.126     | 303.2    | 517   | 3908  | gene expression                               | 5.591e-37 |
| 16 | GO:1901360 | 1.029e-38 | 2.030     | 373.3    | 601   | 4812  | organic cyclic compound metabolic process     | 1.274e-36 |
| 17 | GO:0034645 | 1.064e-38 | 2.173     | 270.7    | 475   | 3489  | cellular macromolecule biosynthetic process   | 1.274e-36 |
| 18 | GO:0009059 | 2.173e-38 | 2.154     | 277.8    | 483   | 3580  | macromolecule biosynthetic process            | 2.457e-36 |
| 19 | GO:0006807 | 1.134e-37 | 1.994     | 390.6    | 618   | 5034  | nitrogen compound metabolic process           | 1.214e-35 |
| 20 | GO:0019538 | 1.286e-37 | 2.120     | 288.4    | 494   | 3717  | protein metabolic process                     | 1.308e-35 |

## GO enrichment analysis with RepeatSoaker

## The number of enriched GO :2025

|    | GOBPID     | Pvalue    | OddsRatio | ExpCount | Count | Size  | Term                                          | p.adj     |
|----|------------|-----------|-----------|----------|-------|-------|-----------------------------------------------|-----------|
| 1  | GO:0008152 | 1.189e-59 | 2.345     | 607.7    | 917   | 9209  | metabolic process                             | 1.782e-56 |
| 2  | GO:0044237 | 1.760e-59 | 2.357     | 511.2    | 813   | 7747  | cellular metabolic process                    | 1.782e-56 |
| 3  | GO:0044238 | 6.221e-59 | 2.343     | 523.5    | 825   | 7933  | primary metabolic process                     | 4.199e-56 |
| 4  | GO:0071704 | 1.769e-57 | 2.312     | 548.3    | 848   | 8309  | organic substance metabolic process           | 8.958e-55 |
| 5  | GO:0009987 | 2.403e-54 | 2.396     | 897.8    | 1185  | 13606 | cellular process                              | 9.733e-52 |
| 6  | GO:0043170 | 5.039e-50 | 2.228     | 439.2    | 706   | 6655  | macromolecule metabolic process               | 1.701e-47 |
| 7  | GO:0044260 | 1.316e-49 | 2.265     | 383.2    | 640   | 5807  | cellular macromolecule metabolic process      | 3.807e-47 |
| 8  | GO:1901576 | 1.403e-40 | 2.214     | 286.1    | 497   | 4335  | organic substance biosynthetic process        | 3.550e-38 |
| 9  | GO:0034645 | 4.446e-40 | 2.317     | 230.2    | 425   | 3489  | cellular macromolecule biosynthetic process   | 1.000e-37 |
| 10 | GO:0071840 | 5.087e-40 | 2.245     | 262.5    | 466   | 3978  | cellular component organization or biogenesis | 1.030e-37 |
| 11 | GO:0009059 | 8.307e-40 | 2.296     | 236.2    | 432   | 3580  | macromolecule biosynthetic process            | 1.529e-37 |
| 12 | GO:0019222 | 1.352e-39 | 2.156     | 311.3    | 525   | 4717  | regulation of metabolic process               | 2.282e-37 |
| 13 | GO:0009058 | 1.538e-39 | 2.185     | 290.9    | 500   | 4409  | biosynthetic process                          | 2.396e-37 |
| 14 | GO:0044249 | 1.929e-39 | 2.200     | 280.6    | 487   | 4253  | cellular biosynthetic process                 | 2.790e-37 |
| 15 | GO:0010467 | 2.978e-39 | 2.237     | 257.9    | 458   | 3908  | gene expression                               | 4.020e-37 |
| 16 | GO:0031323 | 6.336e-39 | 2.213     | 266.6    | 468   | 4040  | regulation of cellular metabolic process      | 8.019e-37 |
| 17 | GO:0016043 | 1.768e-37 | 2.206     | 254.0    | 448   | 3849  | cellular component organization               | 2.105e-35 |
| 18 | GO:1901360 | 4.197e-37 | 2.098     | 317.5    | 525   | 4812  | organic cyclic compound metabolic process     | 4.722e-35 |
| 19 | GO:0080090 | 2.536e-36 | 2.162     | 263.9    | 457   | 3999  | regulation of primary metabolic process       | 2.702e-34 |
| 20 | GO:0006807 | 5.539e-36 | 2.058     | 332.2    | 539   | 5034  | nitrogen compound metabolic process           | 5.609e-34 |

## Reactome enrichment analysis without RepeatSoaker

## The number of enriched Reactome pathways:403

| PathwayID | Pathway                                                                         | N.Selected | N.In.Category | p.value   | p.adj   |
|-----------|---------------------------------------------------------------------------------|------------|---------------|-----------|---------|
| 4809935   | Mus musculus: Gene Expression                                                   | 138        | 839           | 1.706e-47 | 1.810e- |
| 4809951   | Mus musculus: Metabolism of proteins                                            | 123        | 691           | 1.617e-45 | 8.581e- |
| 4809858   | Mus musculus: Metabolism                                                        | 172        | 1504          | 6.770e-40 | 2.394e- |
| 4810524   | Mus musculus: Metabolism of RNA                                                 | 83         | 384           | 2.675e-36 | 7.097e- |
| 4810844   | Mus musculus: Metabolism of mRNA                                                | 80         | 360           | 9.222e-36 | 1.957e- |
| 4809947   | Mus musculus: GTP hydrolysis and joining of the 60S ribosomal subunit           | 68         | 249           | 3.095e-35 | 5.473e- |
| 4810940   | Mus musculus: Nonsense-Mediated Decay                                           | 67         | 245           | 9.088e-35 | 1.156e- |
| 4810941   | Mus musculus: Nonsense Mediated Decay Enhanced by the Exon Junction Complex     | 67         | 245           | 9.088e-35 | 1.156e- |
| 4809948   | Mus musculus: Cap-dependent Translation Initiation                              | 68         | 256           | 1.311e-34 | 1.156e- |
| 4809949   | Mus musculus: Eukaryotic Translation Initiation                                 | 68         | 256           | 1.311e-34 | 1.156e- |
| 4810290   | Mus musculus: L13a-mediated translational silencing of Ceruloplasmin expression | 67         | 247           | 1.379e-34 | 1.156e- |
| 4810291   | Mus musculus: 3' -UTR-mediated translational regulation                         | 67         | 247           | 1.379e-34 | 1.156e- |
| 4810293   | Mus musculus: Eukaryotic Translation Elongation                                 | 65         | 229           | 1.416e-34 | 1.156e- |
| 4810292   | Mus musculus: Peptide chain elongation                                          | 64         | 225           | 4.141e-34 | 3.138e- |
| 4809956   | Mus musculus: Formation of a pool of free 40S subunits                          | 65         | 235           | 5.134e-34 | 3.631e- |
| 4810939   | Mus musculus: Nonsense Mediated Decay Independent of the Exon Junction Complex  | 64         | 228           | 7.928e-34 | 5.257e- |
| 4810283   | Mus musculus: Eukaryotic Translation Termination                                | 63         | 224           | 2.320e-33 | 1.448e- |
| 4809950   | Mus musculus: Translation                                                       | 70         | 297           | 8.212e-33 | 4.840e- |
| 4811072   | Mus musculus: SRP-dependent cotranslational protein targeting to membrane       | 63         | 254           | 9.906e-31 | 5.531e- |
| 4810016   | Mus musculus: Immune System                                                     | 108        | 1045          | 3.316e-22 | 1.759e- |

## Reactome enrichment analysis with RepeatSoaker

## The number of enriched Reactome pathways:390



| PathwayID | Pathway                                                                         | N.Selected | N.In.Category | p.value   | p.adj   |
|-----------|---------------------------------------------------------------------------------|------------|---------------|-----------|---------|
| 4809951   | Mus musculus: Metabolism of proteins                                            | 113        | 691           | 3.822e-45 | 3.871e- |
| 4809935   | Mus musculus: Gene Expression                                                   | 123        | 839           | 1.142e-44 | 5.784e- |
| 4810524   | Mus musculus: Metabolism of RNA                                                 | 78         | 384           | 4.095e-37 | 1.383e- |
| 4809947   | Mus musculus: GTP hydrolysis and joining of the 60S ribosomal subunit           | 65         | 249           | 1.162e-36 | 2.944e- |
| 4810844   | Mus musculus: Metabolism of mRNA                                                | 75         | 360           | 2.258e-36 | 4.575e- |
| 4810940   | Mus musculus: Nonsense-Mediated Decay                                           | 64         | 245           | 3.931e-36 | 5.364e- |
| 4810941   | Mus musculus: Nonsense Mediated Decay Enhanced by the Exon Junction Complex     | 64         | 245           | 3.931e-36 | 5.364e- |
| 4809948   | Mus musculus: Cap-dependent Translation Initiation                              | 65         | 256           | 4.765e-36 | 5.364e- |
| 4809949   | Mus musculus: Eukaryotic Translation Initiation                                 | 65         | 256           | 4.765e-36 | 5.364e- |
| 4810290   | Mus musculus: L13a-mediated translational silencing of Ceruloplasmin expression | 64         | 247           | 5.908e-36 | 5.441e- |
| 4810291   | Mus musculus: 3' -UTR-mediated translational regulation                         | 64         | 247           | 5.908e-36 | 5.441e- |
| 4810293   | Mus musculus: Eukaryotic Translation Elongation                                 | 62         | 229           | 8.482e-36 | 7.160e- |
| 4810292   | Mus musculus: Peptide chain elongation                                          | 61         | 225           | 2.860e-35 | 2.154e- |
| 4809956   | Mus musculus: Formation of a pool of free 40S subunits                          | 62         | 235           | 2.977e-35 | 2.154e- |
| 4810939   | Mus musculus: Nonsense Mediated Decay Independent of the Exon Junction Complex  | 61         | 228           | 5.385e-35 | 3.636e- |
| 4809858   | Mus musculus: Metabolism                                                        | 147        | 1504          | 1.172e-34 | 7.417e- |
| 4810283   | Mus musculus: Eukaryotic Translation Termination                                | 60         | 224           | 1.817e-34 | 1.082e- |
| 4809950   | Mus musculus: Translation                                                       | 67         | 297           | 1.985e-34 | 1.117e- |
| 4811072   | Mus musculus: SRP-dependent cotranslational protein targeting to membrane       | 60         | 254           | 6.624e-32 | 3.532e- |
| 4809952   | Mus musculus: Ribosomal scanning and start codon recognition                    | 34         | 124           | 2.032e-20 | 1.029e- |

## Genes unique for different RepeatSoaker settings

Now, we check what those genes unique to each RepeatSoaker % are (leaves of the Venn diagram). We will look at:

1) Gene names and their description. Note that not all probes can be mapped to gene names, and some probes map to the same gene - therefore, the numbers in the Venn diagram and the tables below differ.

2) GO, KEGG and Reactome Pathway enrichment of those genes, if any.

## Unique genes without RepeatSoaker

|    |               |                                                                                                        |
|----|---------------|--------------------------------------------------------------------------------------------------------|
| 18 | 9930104L06Rik | RIKEN cDNA 9930104L06 gene [Source:MGI Symbol;Acc:MGI:3041172]                                         |
| 20 | Adarb2        | adenosine deaminase, RNA-specific, B2 [Source:MGI Symbol;Acc:MGI:2151118]                              |
| 16 | Creg1         | cellular repressor of E1A-stimulated genes 1 [Source:MGI Symbol;Acc:MGI:1344382]                       |
| 29 | Etohi1        | ethanol induced 1 [Source:MGI Symbol;Acc:MGI:1261426]                                                  |
| 22 | Gm11541       | predicted gene 11541 [Source:MGI Symbol;Acc:MGI:3650066]                                               |
| 31 | Gm14295       | predicted gene 14295 [Source:MGI Symbol;Acc:MGI:3709624]                                               |
| 34 | Gm15564       | predicted gene 15564 [Source:MGI Symbol;Acc:MGI:3783013]                                               |
| 32 | Gm15663       | predicted gene 15663 [Source:MGI Symbol;Acc:MGI:3783105]                                               |
| 35 | Gm24187       | predicted gene, 24187 [Source:MGI Symbol;Acc:MGI:5453964]                                              |
| 30 | Gm24270       | predicted gene, 24270 [Source:MGI Symbol;Acc:MGI:5454047]                                              |
| 25 | Gm26920       | predicted gene, 26920 [Source:MGI Symbol;Acc:MGI:5504035]                                              |
| 3  | Gm872         | RIKEN cDNA 4930485B16 gene [Source:MGI Symbol;Acc:MGI:1922208]                                         |
| 23 | Gpr116        | G protein-coupled receptor 116 [Source:MGI Symbol;Acc:MGI:2182928]                                     |
| 28 | H2-Q6         | histocompatibility 2, Q region locus 6 [Source:MGI Symbol;Acc:MGI:95935]                               |
| 11 | Ing3          | inhibitor of growth family, member 3 [Source:MGI Symbol;Acc:MGI:1919027]                               |
| 10 | Klh30         | kelch-like 30 [Source:MGI Symbol;Acc:MGI:1918038]                                                      |
| 21 | Lins          | lines homolog (Drosophila) [Source:MGI Symbol;Acc:MGI:1919885]                                         |
| 24 | Mex3b         | mex3 homolog B (C. elegans) [Source:MGI Symbol;Acc:MGI:1918252]                                        |
| 27 | Nanos1        | nanos homolog 1 (Drosophila) [Source:MGI Symbol;Acc:MGI:2669254]                                       |
| 9  | Ndufb8        | NADH dehydrogenase (ubiquinone) 1 beta subcomplex 8 [Source:MGI Symbol;Acc:MGI:1914514]                |
| 1  | Npepps        | aminopeptidase puromycin sensitive [Source:MGI Symbol;Acc:MGI:1101358]                                 |
| 15 | Parp11        | poly (ADP-ribose) polymerase family, member 11 [Source:MGI Symbol;Acc:MGI:2141505]                     |
| 2  | Ppil4         | peptidylprolyl isomerase (cyclophilin)-like 4 [Source:MGI Symbol;Acc:MGI:1914668]                      |
| 6  | Rbm26         | RNA binding motif protein 26 [Source:MGI Symbol;Acc:MGI:1921463]                                       |
| 13 | Rspo4         | R-spondin family, member 4 [Source:MGI Symbol;Acc:MGI:1924467]                                         |
| 26 | Sat2          | spermidine/spermine N1-acetyl transferase 2 [Source:MGI Symbol;Acc:MGI:1916465]                        |
| 4  | Shmt1         | serine hydroxymethyltransferase 1 (soluble) [Source:MGI Symbol;Acc:MGI:98299]                          |
| 8  | Slc4a8        | solute carrier family 4 (anion exchanger), member 8 [Source:MGI Symbol;Acc:MGI:1928745]                |
| 19 | Tnfrsf26      | tumor necrosis factor receptor superfamily, member 26 [Source:MGI Symbol;Acc:MGI:2651928]              |
| 14 | Tstd2         | thiosulfate sulfurtransferase (rhodanese)-like domain containing 2 [Source:MGI Symbol;Acc:MGI:3039624] |
| 7  | Utp23         | UTP23, small subunit (SSU) processome component, homolog (yeast) [Source:MGI Symbol;Acc:MGI:1925831]   |

## The number of enriched KEGG :10

|    | KEGGID | Pvalue  | OddsRatio | ExpCount | Count | Size | Term                                     | p.adj   |
|----|--------|---------|-----------|----------|-------|------|------------------------------------------|---------|
| 1  | 00460  | 0.00360 | 443.40    | 0.003604 | 1     | 6    | Cyanoamino acid metabolism               | 0.03600 |
| 2  | 00670  | 0.01137 | 122.93    | 0.011411 | 1     | 19   | One carbon pool by folate                | 0.04372 |
| 3  | 01100  | 0.01944 | 13.91     | 0.711111 | 3     | 1184 | Metabolic pathways                       | 0.04372 |
| 4  | 00260  | 0.02027 | 66.90     | 0.020420 | 1     | 34   | Glycine, serine and threonine metabolism | 0.04372 |
| 5  | 05330  | 0.03087 | 43.17     | 0.031231 | 1     | 52   | Allograft rejection                      | 0.04372 |
| 6  | 00330  | 0.03205 | 41.53     | 0.032432 | 1     | 54   | Arginine and proline metabolism          | 0.04372 |
| 7  | 05332  | 0.03205 | 41.53     | 0.032432 | 1     | 54   | Graft-versus-host disease                | 0.04372 |
| 8  | 04940  | 0.03498 | 37.92     | 0.035435 | 1     | 59   | Type I diabetes mellitus                 | 0.04372 |
| 9  | 05320  | 0.03965 | 33.28     | 0.040240 | 1     | 67   | Autoimmune thyroid disease               | 0.04405 |
| 10 | 04612  | 0.04604 | 28.48     | 0.046847 | 1     | 78   | Antigen processing and presentation      | 0.04604 |

## The number of enriched GO :31

|    | GOBPID     | Pvalue   | OddsRatio | ExpCount | Count | Size | Term                                                   | p.adj   |
|----|------------|----------|-----------|----------|-------|------|--------------------------------------------------------|---------|
| 1  | GO:0019264 | 0.002585 | 798.07    | 0.002586 | 1     | 2    | glycine biosynthetic process from serine               | 0.03373 |
| 2  | GO:0046655 | 0.002585 | 798.07    | 0.002586 | 1     | 2    | folic acid metabolic process                           | 0.03373 |
| 3  | GO:0006565 | 0.003874 | 399.02    | 0.003879 | 1     | 3    | L-serine catabolic process                             | 0.03373 |
| 4  | GO:0006545 | 0.006449 | 199.49    | 0.006465 | 1     | 5    | glycine biosynthetic process                           | 0.03373 |
| 5  | GO:0008215 | 0.007734 | 159.59    | 0.007758 | 1     | 6    | spermine metabolic process                             | 0.03373 |
| 6  | GO:0009113 | 0.007734 | 159.59    | 0.007758 | 1     | 6    | purine nucleobase biosynthetic process                 | 0.03373 |
| 7  | GO:0006120 | 0.009018 | 132.98    | 0.009051 | 1     | 7    | mitochondrial electron transport, NADH to ubiquinone   | 0.03373 |
| 8  | GO:0006563 | 0.010299 | 113.98    | 0.010345 | 1     | 8    | L-serine metabolic process                             | 0.03373 |
| 9  | GO:0008216 | 0.010299 | 113.98    | 0.010345 | 1     | 8    | spermidine metabolic process                           | 0.03373 |
| 10 | GO:0046112 | 0.011580 | 99.73     | 0.011638 | 1     | 9    | nucleobase biosynthetic process                        | 0.03373 |
| 11 | GO:0009070 | 0.015410 | 72.52     | 0.015517 | 1     | 12   | serine family amino acid biosynthetic process          | 0.03373 |
| 12 | GO:0043968 | 0.015410 | 72.52     | 0.015517 | 1     | 12   | histone H2A acetylation                                | 0.03373 |
| 13 | GO:0006144 | 0.016684 | 66.47     | 0.016810 | 1     | 13   | purine nucleobase metabolic process                    | 0.03373 |
| 14 | GO:0043129 | 0.016684 | 66.47     | 0.016810 | 1     | 13   | surfactant homeostasis                                 | 0.03373 |
| 15 | GO:0015980 | 0.017920 | 10.45     | 0.205598 | 2     | 159  | energy derivation by oxidation of organic compounds    | 0.03373 |
| 16 | GO:0048875 | 0.019227 | 56.97     | 0.019396 | 1     | 15   | chemical homeostasis within a tissue                   | 0.03373 |
| 17 | GO:0009071 | 0.020496 | 53.17     | 0.020689 | 1     | 16   | serine family amino acid catabolic process             | 0.03373 |
| 18 | GO:0042775 | 0.020496 | 53.17     | 0.020689 | 1     | 16   | mitochondrial ATP synthesis coupled electron transport | 0.03373 |
| 19 | GO:0006544 | 0.021763 | 49.85     | 0.021982 | 1     | 17   | glycine metabolic process                              | 0.03373 |
| 20 | GO:0006595 | 0.021763 | 49.85     | 0.021982 | 1     | 17   | polyamine metabolic process                            | 0.03373 |

## The number of enriched Reactome pathways:0

## Unique genes with 75% RepeatSoaker

|   | external_gene_id | description                                                                                          |
|---|------------------|------------------------------------------------------------------------------------------------------|
| 5 | Cyb5d2           | cytochrome b5 domain containing 2 [Source:MGI Symbol;Acc:MGI:2684848]                                |
| 2 | Hspbap1          | Hspb associated protein 1 [Source:MGI Symbol;Acc:MGI:1913917]                                        |
| 1 | Mpp5             | membrane protein, palmitoylated 5 (MAGUK p55 subfamily member 5) [Source:MGI Symbol;Acc:MGI:1927339] |
| 4 | Mypop            | Myb-related transcription factor, partner of profilin [Source:MGI Symbol;Acc:MGI:2446472]            |
| 3 | Tead2            | TEA domain family member 2 [Source:MGI Symbol;Acc:MGI:104904]                                        |

## The number of enriched KEGG :1

|   | KEGGID | Pvalue  | OddsRatio | ExpCount | Count | Size | Term           | p.adj   |
|---|--------|---------|-----------|----------|-------|------|----------------|---------|
| 1 | 04530  | 0.02057 | Inf       | 0.02057  | 1     | 137  | Tight junction | 0.02057 |

## The number of enriched GO :52

|    | GOBPID     | Pvalue    | OddsRatio | ExpCount  | Count | Size | Term                                                     | p.adj   |
|----|------------|-----------|-----------|-----------|-------|------|----------------------------------------------------------|---------|
| 1  | GO:0035750 | 0.0002086 | Inf       | 0.0002086 | 1     | 1    | protein localization to myelin sheath abaxonal region    | 0.01085 |
| 2  | GO:0032287 | 0.0014592 | 998.46    | 0.0014599 | 1     | 7    | peripheral nervous system myelin maintenance             | 0.01856 |
| 3  | GO:0043217 | 0.0022922 | 598.98    | 0.0022942 | 1     | 11   | myelin maintenance                                       | 0.01856 |
| 4  | GO:0007399 | 0.0024296 | 21.79     | 0.3226412 | 3     | 1547 | nervous system development                               | 0.01856 |
| 5  | GO:0008105 | 0.0025004 | 544.50    | 0.0025027 | 1     | 12   | asymmetric protein localization                          | 0.01856 |
| 6  | GO:0048368 | 0.0029167 | 460.69    | 0.0029198 | 1     | 14   | lateral mesoderm development                             | 0.01856 |
| 7  | GO:0030903 | 0.0035408 | 374.27    | 0.0035455 | 1     | 17   | notochord development                                    | 0.01856 |
| 8  | GO:0022011 | 0.0037487 | 352.24    | 0.0037541 | 1     | 18   | myelination in peripheral nervous system                 | 0.01856 |
| 9  | GO:0032288 | 0.0037487 | 352.24    | 0.0037541 | 1     | 18   | myelin assembly                                          | 0.01856 |
| 10 | GO:0032292 | 0.0037487 | 352.24    | 0.0037541 | 1     | 18   | peripheral nervous system axon ensheathment              | 0.01856 |
| 11 | GO:0048339 | 0.0041646 | 315.13    | 0.0041712 | 1     | 20   | paraxial mesoderm development                            | 0.01856 |
| 12 | GO:0014044 | 0.0043724 | 299.36    | 0.0043797 | 1     | 21   | Schwann cell development                                 | 0.01856 |
| 13 | GO:0035329 | 0.0047881 | 272.12    | 0.0047969 | 1     | 23   | hippo signaling cascade                                  | 0.01856 |
| 14 | GO:0046939 | 0.0049958 | 260.28    | 0.0050054 | 1     | 24   | nucleotide phosphorylation                               | 0.01856 |
| 15 | GO:0014037 | 0.0054112 | 239.44    | 0.0054225 | 1     | 26   | Schwann cell differentiation                             | 0.01876 |
| 16 | GO:0003143 | 0.0116258 | 108.70    | 0.0116793 | 1     | 56   | embryonic heart tube morphogenesis                       | 0.03548 |
| 17 | GO:0048646 | 0.0120655 | 17.87     | 0.1801952 | 2     | 864  | anatomical structure formation involved in morphogenesis | 0.03548 |
| 18 | GO:0007422 | 0.0126586 | 99.62     | 0.0127221 | 1     | 61   | peripheral nervous system development                    | 0.03548 |
| 19 | GO:0021782 | 0.0138967 | 90.54     | 0.0139735 | 1     | 67   | glial cell development                                   | 0.03548 |
| 20 | GO:0090002 | 0.0143092 | 87.87     | 0.0143906 | 1     | 69   | establishment of protein localization to plasma membrane | 0.03548 |

## The number of enriched Reactome pathways:6

|   | PathwayID | Pathway                                                        | N.Selected | N.In.Category | p.value  | p.adj    |
|---|-----------|----------------------------------------------------------------|------------|---------------|----------|----------|
| 6 | 4810822   | Mus musculus: Tight junction interactions                      | 1          | 10            | 0.000948 | 0.003620 |
| 7 | 4811094   | Mus musculus: YAP1- and WWTR1 (TAZ)-stimulated gene expression | 1          | 11            | 0.001034 | 0.003620 |
| 4 | 4810815   | Mus musculus: Cell-cell junction organization                  | 1          | 37            | 0.003272 | 0.007635 |
| 5 | 4810816   | Mus musculus: Cell junction organization                       | 1          | 63            | 0.005506 | 0.009635 |
| 3 | 4810638   | Mus musculus: Cell-Cell communication                          | 1          | 100           | 0.008678 | 0.012149 |
| 2 | 4810429   | Mus musculus: Generic Transcription Pathway                    | 1          | 128           | 0.011073 | 0.012918 |

**Unique genes with 50% RepeatSoaker**



|   | external_gene_id | description                                                                                      |
|---|------------------|--------------------------------------------------------------------------------------------------|
| 7 | Chrm2            | cholinergic receptor, muscarinic 2, cardiac [Source:MGI Symbol;Acc:MGI:88397]                    |
| 2 | Ern1             | endoplasmic reticulum (ER) to nucleus signalling 1 [Source:MGI Symbol;Acc:MGI:1930134]           |
| 4 | Gnl1             | guanine nucleotide binding protein-like 1 [Source:MGI Symbol;Acc:MGI:95764]                      |
| 5 | Gxylt1           | glucoside xylosyltransferase 1 [Source:MGI Symbol;Acc:MGI:2684933]                               |
| 9 | Ism1             | isthmin 1 homolog (zebrafish) [Source:MGI Symbol;Acc:MGI:2442963]                                |
| 8 | Lekr1            | leucine, glutamate and lysine rich 1 [Source:MGI Symbol;Acc:MGI:3645902]                         |
| 6 | Mob1a            | MOB kinase activator 1A [Source:MGI Symbol;Acc:MGI:2442631]                                      |
| 1 | Slc29a3          | solute carrier family 29 (nucleoside transporters), member 3 [Source:MGI Symbol;Acc:MGI:1918529] |
| 3 | Zfp346           | zinc finger protein 346 [Source:MGI Symbol;Acc:MGI:1349417]                                      |

## The number of enriched KEGG :1

|   | KEGGID | Pvalue  | OddsRatio | ExpCount | Count | Size | Term                                 | p.adj   |
|---|--------|---------|-----------|----------|-------|------|--------------------------------------|---------|
| 1 | 00514  | 0.01925 | 78.75     | 0.01937  | 1     | 43   | Other types of O-glycan biosynthesis | 0.01925 |

## The number of enriched GO :32

| GOBPID     | Pvalue   | OddsRatio | ExpCount | Count | Size | Term                                                                              |    |
|------------|----------|-----------|----------|-------|------|-----------------------------------------------------------------------------------|----|
| GO:0006987 | 0.001001 | 1711.71   | 0.001001 | 1     | 3    | activation of signaling protein activity involved in unfolded protein response    | 0. |
| GO:0016266 | 0.001001 | 1711.71   | 0.001001 | 1     | 3    | O-glycan processing                                                               | 0. |
| GO:1900103 | 0.001334 | 1141.10   | 0.001335 | 1     | 4    | positive regulation of endoplasmic reticulum unfolded protein response            | 0. |
| GO:0032075 | 0.001668 | 855.79    | 0.001668 | 1     | 5    | positive regulation of nuclease activity                                          | 0. |
| GO:1900101 | 0.001668 | 855.79    | 0.001668 | 1     | 5    | regulation of endoplasmic reticulum unfolded protein response                     | 0. |
| GO:0007213 | 0.002667 | 488.96    | 0.002670 | 1     | 8    | G-protein coupled acetylcholine receptor signaling pathway                        | 0. |
| GO:0032069 | 0.003333 | 380.27    | 0.003337 | 1     | 10   | regulation of nuclease activity                                                   | 0. |
| GO:0015858 | 0.004330 | 285.17    | 0.004338 | 1     | 13   | nucleoside transport                                                              | 0. |
| GO:0035329 | 0.007650 | 155.48    | 0.007675 | 1     | 23   | hippo signaling cascade                                                           | 0. |
| GO:0070059 | 0.009307 | 126.66    | 0.009343 | 1     | 28   | intrinsic apoptotic signaling pathway in response to endoplasmic reticulum stress | 0. |
| GO:0006493 | 0.009638 | 122.13    | 0.009677 | 1     | 29   | protein O-linked glycosylation                                                    | 0. |
| GO:0030968 | 0.010299 | 113.98    | 0.010345 | 1     | 31   | endoplasmic reticulum unfolded protein response                                   | 0. |
| GO:0034620 | 0.010630 | 110.30    | 0.010678 | 1     | 32   | cellular response to unfolded protein                                             | 0. |
| GO:1901264 | 0.011952 | 97.68     | 0.012013 | 1     | 36   | carbohydrate derivative transport                                                 | 0. |
| GO:0035967 | 0.012282 | 94.96     | 0.012347 | 1     | 37   | cellular response to topologically incorrect protein                              | 0. |
| GO:0006984 | 0.014261 | 81.37     | 0.014349 | 1     | 43   | ER-nucleus signaling pathway                                                      | 0. |
| GO:0006940 | 0.015249 | 75.94     | 0.015350 | 1     | 46   | regulation of smooth muscle contraction                                           | 0. |
| GO:0006986 | 0.020833 | 55.08     | 0.021023 | 1     | 63   | response to unfolded protein                                                      | 0. |
| GO:0034976 | 0.022798 | 50.21     | 0.023025 | 1     | 69   | response to endoplasmic reticulum stress                                          | 0. |
| GO:0035966 | 0.022798 | 50.21     | 0.023025 | 1     | 69   | response to topologically incorrect protein                                       | 0. |

## The number of enriched Reactome pathways:25

| PathwayID | Pathway                                                                                                | N.Selected | N.In.Category | p.value  |
|-----------|--------------------------------------------------------------------------------------------------------|------------|---------------|----------|
| 67        | Mus musculus: Muscarinic acetylcholine receptors                                                       | 1          | 5             | 0.000930 |
| 20        | Mus musculus: Transport of nucleosides and free purine and pyrimidine bases across the plasma membrane | 1          | 7             | 0.001240 |
| 02        | Mus musculus: Signaling by Hippo                                                                       | 1          | 20            | 0.003254 |
| 86        | Mus musculus: A tetrasaccharide linker sequence is required for GAG synthesis                          | 1          | 25            | 0.004027 |
| 21        | Mus musculus: Transport of vitamins, nucleosides, and related molecules                                | 1          | 32            | 0.005109 |
| 66        | Mus musculus: Amine ligand-binding receptors                                                           | 1          | 35            | 0.005572 |
| 38        | Mus musculus: Activation of Chaperones by IRE1alpha                                                    | 1          | 46            | 0.007270 |
| 51        | Mus musculus: Chondroitin sulfate/dermatan sulfate metabolism                                          | 1          | 46            | 0.007270 |
| 13        | Mus musculus: Heparan sulfate/heparin (HS-GAG) metabolism                                              | 1          | 48            | 0.007578 |
| 36        | Mus musculus: Unfolded Protein Response                                                                | 1          | 62            | 0.009734 |
| 57        | Mus musculus: Glycosaminoglycan metabolism                                                             | 1          | 110           | 0.017094 |
| 58        | Mus musculus: MPS IX - Natowicz syndrome                                                               | 1          | 110           | 0.017094 |
| 59        | Mus musculus: Mucopolysaccharidoses                                                                    | 1          | 110           | 0.017094 |
| 60        | Mus musculus: MPS IIIB - Sanfilippo syndrome B                                                         | 1          | 110           | 0.017094 |
| 61        | Mus musculus: MPS VI - Maroteaux-Lamy syndrome                                                         | 1          | 110           | 0.017094 |
| 62        | Mus musculus: MPS IV - Morquio syndrome A                                                              | 1          | 110           | 0.017094 |
| 63        | Mus musculus: MPS IIIC - Sanfilippo syndrome C                                                         | 1          | 110           | 0.017094 |
| 64        | Mus musculus: MPS VII - Sly syndrome                                                                   | 1          | 110           | 0.017094 |
| 65        | Mus musculus: MPS II - Hunter syndrome                                                                 | 1          | 110           | 0.017094 |
| 66        | Mus musculus: MPS I - Hurler syndrome                                                                  | 1          | 110           | 0.017094 |

## Unique genes with 25% RepeatSoaker

|    | external_gene_id | description                                                                                     |
|----|------------------|-------------------------------------------------------------------------------------------------|
| 15 | Cacna1c          | calcium channel, voltage-dependent, L type, alpha 1C subunit [Source:MGI Symbol;Acc:MGI:103013] |
| 2  | Cars             | cysteinyl-tRNA synthetase [Source:MGI Symbol;Acc:MGI:1351477]                                   |
| 18 | Casc4            | cancer susceptibility candidate 4 [Source:MGI Symbol;Acc:MGI:2443129]                           |
| 11 | Dennd6a          | DENN/MADD domain containing 6A [Source:MGI Symbol;Acc:MGI:2442980]                              |
| 10 | Fam102a          | family with sequence similarity 102, member A [Source:MGI Symbol;Acc:MGI:2138935]               |
| 6  | Fgd1             | FYVE, RhoGEF and PH domain containing 1 [Source:MGI Symbol;Acc:MGI:104566]                      |
| 4  | Fos              | FBJ osteosarcoma oncogene [Source:MGI Symbol;Acc:MGI:95574]                                     |
| 3  | Gltsd2           | glycosyltransferase 8 domain containing 2 [Source:MGI Symbol;Acc:MGI:1922032]                   |
| 9  | Hiatl1           | hippocampus abundant transcript-like 1 [Source:MGI Symbol;Acc:MGI:1913881]                      |
| 8  | Inpp4b           | inositol polyphosphate-4-phosphatase, type II [Source:MGI Symbol;Acc:MGI:2158925]               |
| 13 | Mars2            | methionine-tRNA synthetase 2 (mitochondrial) [Source:MGI Symbol;Acc:MGI:2444136]                |
| 19 | Nbeal1           | neurobeachin like 1 [Source:MGI Symbol;Acc:MGI:2444343]                                         |
| 16 | Pgpep1           | pyroglutamyl-peptidase I [Source:MGI Symbol;Acc:MGI:1913772]                                    |
| 12 | Phlpp1           | PH domain and leucine rich repeat protein phosphatase 1 [Source:MGI Symbol;Acc:MGI:2138327]     |
| 1  | Pknx1            | Pbx/knotted 1 homeobox [Source:MGI Symbol;Acc:MGI:1201409]                                      |
| 5  | Sdf2l1           | stromal cell-derived factor 2-like 1 [Source:MGI Symbol;Acc:MGI:2149842]                        |
| 7  | Stx2             | syntaxin 2 [Source:MGI Symbol;Acc:MGI:108059]                                                   |
| 14 | Usp14            | ubiquitin specific peptidase 14 [Source:MGI Symbol;Acc:MGI:1928898]                             |
| 17 | Zfp462           | zinc finger protein 462 [Source:MGI Symbol;Acc:MGI:107690]                                      |

## The number of enriched KEGG :4

|   | KEGGID | Pvalue   | OddsRatio | ExpCount | Count | Size | Term                                      | p.adj    |
|---|--------|----------|-----------|----------|-------|------|-------------------------------------------|----------|
| 1 | 00970  | 0.001909 | 41.841    | 0.06832  | 2     | 65   | Aminoacyl-tRNA biosynthesis               | 0.007634 |
| 2 | 00450  | 0.017740 | 69.135    | 0.01787  | 1     | 17   | Selenocompound metabolism                 | 0.035479 |
| 3 | 04010  | 0.029632 | 9.605     | 0.28168  | 2     | 268  | MAPK signaling pathway                    | 0.036228 |
| 4 | 04130  | 0.036228 | 32.446    | 0.03679  | 1     | 35   | SNARE interactions in vesicular transport | 0.036228 |

## The number of enriched GO :101

|    | GOBPID     | Pvalue    | OddsRatio | ExpCount | Count | Size | Term                                                           | p.adj   |
|----|------------|-----------|-----------|----------|-------|------|----------------------------------------------------------------|---------|
| 1  | GO:0006418 | 0.0004790 | 72.14     | 0.032494 | 2     | 41   | tRNA aminoacylation for protein translation                    | 0.01600 |
| 2  | GO:0043038 | 0.0005519 | 66.98     | 0.034871 | 2     | 44   | amino acid activation                                          | 0.01600 |
| 3  | GO:0043039 | 0.0005519 | 66.98     | 0.034871 | 2     | 44   | tRNA aminoacylation                                            | 0.01600 |
| 4  | GO:0045670 | 0.0007413 | 57.40     | 0.040419 | 2     | 51   | regulation of osteoclast differentiation                       | 0.01600 |
| 5  | GO:0017156 | 0.0008005 | 55.14     | 0.042004 | 2     | 53   | calcium ion-dependent exocytosis                               | 0.01600 |
| 6  | GO:0030099 | 0.0013433 | 15.97     | 0.222700 | 3     | 281  | myeloid cell differentiation                                   | 0.01600 |
| 7  | GO:0030316 | 0.0013916 | 41.33     | 0.055477 | 2     | 70   | osteoclast differentiation                                     | 0.01600 |
| 8  | GO:0006423 | 0.0015845 | 1330.78   | 0.001585 | 1     | 2    | cysteinyI-tRNA aminoacylation                                  | 0.01600 |
| 9  | GO:0006431 | 0.0015845 | 1330.78   | 0.001585 | 1     | 2    | methionyl-tRNA aminoacylation                                  | 0.01600 |
| 10 | GO:0090038 | 0.0015845 | 1330.78   | 0.001585 | 1     | 2    | negative regulation of protein kinase C signaling cascade      | 0.01600 |
| 11 | GO:2000049 | 0.0023758 | 665.36    | 0.002378 | 1     | 3    | positive regulation of cell-cell adhesion mediated by cadherin | 0.01976 |
| 12 | GO:0002761 | 0.0023873 | 31.20     | 0.072912 | 2     | 92   | regulation of myeloid leukocyte differentiation                | 0.01976 |
| 13 | GO:0051896 | 0.0025428 | 30.19     | 0.075290 | 2     | 95   | regulation of protein kinase B signaling cascade               | 0.01976 |
| 14 | GO:0002521 | 0.0031003 | 11.82     | 0.298782 | 3     | 377  | leukocyte differentiation                                      | 0.02132 |
| 15 | GO:0060083 | 0.0031665 | 443.56    | 0.003170 | 1     | 4    | smooth muscle contraction involved in micturition              | 0.02132 |
| 16 | GO:0043491 | 0.0038247 | 24.39     | 0.092725 | 2     | 117  | protein kinase B signaling cascade                             | 0.02220 |
| 17 | GO:0000920 | 0.0039567 | 332.65    | 0.003963 | 1     | 5    | cytokinetic cell separation                                    | 0.02220 |
| 18 | GO:2000047 | 0.0039567 | 332.65    | 0.003963 | 1     | 5    | regulation of cell-cell adhesion mediated by cadherin          | 0.02220 |
| 19 | GO:0006399 | 0.0042169 | 23.17     | 0.097481 | 2     | 123  | tRNA metabolic process                                         | 0.02242 |
| 20 | GO:0036092 | 0.0047462 | 266.11    | 0.004755 | 1     | 6    | phosphatidylinositol-3-phosphate biosynthetic process          | 0.02283 |

## The number of enriched Reactome pathways:51

|    | PathwayID | Pathway                                                                   | N.Selected | N.In.Category | p.value   | p.adj    |
|----|-----------|---------------------------------------------------------------------------|------------|---------------|-----------|----------|
| 8  | 4809934   | Mus musculus: tRNA Aminoacylation                                         | 2          | 43            | 9.978e-05 | 0.008282 |
| 28 | 4810023   | Mus musculus: Fc epsilon receptor (FCERI) signaling                       | 2          | 164           | 1.348e-03 | 0.049909 |
| 75 | 4810594   | Mus musculus: Negative regulation of the PI3K/AKT network                 | 1          | 6             | 2.291e-03 | 0.049909 |
| 83 | 4811081   | Mus musculus: Synthesis of IP2, IP, and Ins in the cytosol                | 1          | 10            | 3.597e-03 | 0.049909 |
| 13 | 4810001   | Mus musculus: Signalling by NGF                                           | 2          | 279           | 3.787e-03 | 0.049909 |
| 59 | 4810383   | Mus musculus: Activation of the AP-1 family of transcription factors      | 1          | 11            | 3.924e-03 | 0.049909 |
| 81 | 4811067   | Mus musculus: Synthesis of PIPs at the early endosome membrane            | 1          | 12            | 4.250e-03 | 0.049909 |
| 77 | 4810727   | Mus musculus: Mitochondrial tRNA aminoacylation                           | 1          | 22            | 7.508e-03 | 0.049909 |
| 7  | 4809933   | Mus musculus: Cytosolic tRNA aminoacylation                               | 1          | 25            | 8.483e-03 | 0.049909 |
| 80 | 4811062   | Mus musculus: Synthesis of PIPs at the plasma membrane                    | 1          | 28            | 9.458e-03 | 0.049909 |
| 60 | 4810384   | Mus musculus: MAPK targets/ Nuclear events mediated by MAP kinases        | 1          | 30            | 1.011e-02 | 0.049909 |
| 78 | 4810794   | Mus musculus: Inhibition of Insulin Secretion by Adrenaline/Noradrenaline | 1          | 30            | 1.011e-02 | 0.049909 |
| 76 | 4810711   | Mus musculus: NCAM1 interactions                                          | 1          | 35            | 1.173e-02 | 0.049909 |
| 24 | 4810015   | Mus musculus: Innate Immune System                                        | 2          | 519           | 1.244e-02 | 0.049909 |
| 35 | 4810145   | Mus musculus: FCERI mediated MAPK activation                              | 1          | 41            | 1.367e-02 | 0.049909 |
| 82 | 4811080   | Mus musculus: Inositol phosphate metabolism                               | 1          | 45            | 1.496e-02 | 0.049909 |
| 79 | 4811043   | Mus musculus: PI Metabolism                                               | 1          | 46            | 1.529e-02 | 0.049909 |
| 65 | 4810549   | Mus musculus: NRAGE signals death through JNK                             | 1          | 47            | 1.561e-02 | 0.049909 |
| 36 | 4810150   | Mus musculus: MAP kinase activation in TLR cascade                        | 1          | 55            | 1.819e-02 | 0.049909 |
| 56 | 4810239   | Mus musculus: G alpha (12/13) signalling events                           | 1          | 57            | 1.883e-02 | 0.049909 |

**Unique genes with 00% RepeatSoaker**



|    |           |                                                                                                           |
|----|-----------|-----------------------------------------------------------------------------------------------------------|
| 21 | Epha5     | Eph receptor A5 [Source:MGI Symbol;Acc:MGI:99654]                                                         |
| 29 | Ephx1     | epoxide hydrolase 1, microsomal [Source:MGI Symbol;Acc:MGI:95405]                                         |
| 19 | Exo5      | exonuclease 5 [Source:MGI Symbol;Acc:MGI:1920422]                                                         |
| 9  | Fbxl6     | F-box and leucine-rich repeat protein 6 [Source:MGI Symbol;Acc:MGI:1354705]                               |
| 27 | Galt      | galactose-1-phosphate uridyl transferase [Source:MGI Symbol;Acc:MGI:95638]                                |
| 24 | Gga1      | golgi associated, gamma adaptin ear containing, ARF binding protein 1 [Source:MGI Symbol;Acc:MGI:2146207] |
| 50 | Gm13443   | predicted gene 13443 [Source:MGI Symbol;Acc:MGI:3649615]                                                  |
| 55 | Gm5577    | predicted gene 5577 [Source:MGI Symbol;Acc:MGI:3648213]                                                   |
| 52 | H2-Q1     | histocompatibility 2, Q region locus 1 [Source:MGI Symbol;Acc:MGI:95928]                                  |
| 40 | H2-Q7     | histocompatibility 2, Q region locus 7 [Source:MGI Symbol;Acc:MGI:95936]                                  |
| 2  | Hdgf      | hepatoma-derived growth factor [Source:MGI Symbol;Acc:MGI:1194494]                                        |
| 42 | Hs6st2    | heparan sulfate 6-O-sulfotransferase 2 [Source:MGI Symbol;Acc:MGI:1354959]                                |
| 12 | Incnp     | inner centromere protein [Source:MGI Symbol;Acc:MGI:1313288]                                              |
| 17 | Invs      | inversin [Source:MGI Symbol;Acc:MGI:1335082]                                                              |
| 6  | Ippk      | inositol 1,3,4,5,6-pentakisphosphate 2-kinase [Source:MGI Symbol;Acc:MGI:1922928]                         |
| 33 | Mdga1     | MAM domain containing glycosylphosphatidylinositol anchor 1 [Source:MGI Symbol;Acc:MGI:1922012]           |
| 45 | Mocs1     | molybdenum cofactor synthesis 1 [Source:MGI Symbol;Acc:MGI:1928904]                                       |
| 23 | Nlrp3     | NLR family, pyrin domain containing 3 [Source:MGI Symbol;Acc:MGI:2653833]                                 |
| 31 | Nphp4     | nephronophthisis 4 (juvenile) homolog (human) [Source:MGI Symbol;Acc:MGI:2384210]                         |
| 15 | Orc4      | origin recognition complex, subunit 4 [Source:MGI Symbol;Acc:MGI:1347043]                                 |
| 48 | Peg12     | paternally expressed 12 [Source:MGI Symbol;Acc:MGI:1351637]                                               |
| 5  | Pls3      | plastin 3 (T-isoform) [Source:MGI Symbol;Acc:MGI:104807]                                                  |
| 49 | Pnma2     | PNMA-like 2 [Source:MGI Symbol;Acc:MGI:3645856]                                                           |
| 39 | Ppih      | peptidyl prolyl isomerase H [Source:MGI Symbol;Acc:MGI:106499]                                            |
| 34 | Prrt2     | proline-rich transmembrane protein 2 [Source:MGI Symbol;Acc:MGI:1916267]                                  |
| 51 | Rab11b    | RAB11B, member RAS oncogene family [Source:MGI Symbol;Acc:MGI:99425]                                      |
| 53 | Rpl13-ps1 | ribosomal protein L13, pseudogene 1 [Source:MGI Symbol;Acc:MGI:3649805]                                   |
| 47 | Rpl34-ps1 | ribosomal protein L34, pseudogene 1 [Source:MGI Symbol;Acc:MGI:3704270]                                   |
| 44 | Rpl711    | ribosomal protein L7-like 1 [Source:MGI Symbol;Acc:MGI:1913479]                                           |
| 54 | Rpsa-ps9  | ribosomal protein SA, pseudogene 9 [Source:MGI Symbol;Acc:MGI:3650393]                                    |
| 7  | Sap18     | Sin3-associated polypeptide 18 [Source:MGI Symbol;Acc:MGI:1277978]                                        |
| 13 | Sdc3      | syndecan 3 [Source:MGI Symbol;Acc:MGI:1349163]                                                            |

## The number of enriched KEGG :10

|    | KEGGID | Pvalue   | OddsRatio | ExpCount | Count | Size | Term                                     | p.adj   |
|----|--------|----------|-----------|----------|-------|------|------------------------------------------|---------|
| 1  | 04962  | 0.007187 | 17.883    | 0.12913  | 2     | 43   | Vasopressin-regulated water reabsorption | 0.02646 |
| 2  | 04514  | 0.009462 | 7.849     | 0.44745  | 3     | 149  | Cell adhesion molecules (CAMs)           | 0.02646 |
| 3  | 05330  | 0.010384 | 14.644    | 0.15616  | 2     | 52   | Allograft rejection                      | 0.02646 |
| 4  | 05332  | 0.011167 | 14.077    | 0.16216  | 2     | 54   | Graft-versus-host disease                | 0.02646 |
| 5  | 04940  | 0.013232 | 12.832    | 0.17718  | 2     | 59   | Type I diabetes mellitus                 | 0.02646 |
| 6  | 05320  | 0.016856 | 11.239    | 0.20120  | 2     | 67   | Autoimmune thyroid disease               | 0.02809 |
| 7  | 04612  | 0.022448 | 9.596     | 0.23423  | 2     | 78   | Antigen processing and presentation      | 0.02965 |
| 8  | 04144  | 0.026769 | 5.223     | 0.66066  | 3     | 220  | Endocytosis                              | 0.02965 |
| 9  | 05416  | 0.028703 | 8.369     | 0.26727  | 2     | 89   | Viral myocarditis                        | 0.02965 |
| 10 | 04122  | 0.029647 | 38.778    | 0.03003  | 1     | 10   | Sulfur relay system                      | 0.02965 |

## The number of enriched GO :109

| GOBPID     | Pvalue    | OddsRatio | ExpCount | Count | Size | Term                                                                   | p.ad  |
|------------|-----------|-----------|----------|-------|------|------------------------------------------------------------------------|-------|
| GO:0002474 | 0.0007595 | 56.518    | 0.040878 | 2     | 20   | antigen processing and presentation of peptide antigen via MHC class I | 0.035 |
| GO:0006258 | 0.0020439 | Inf       | 0.002044 | 1     | 1    | UDP-glucose catabolic process                                          | 0.035 |
| GO:0052746 | 0.0020439 | Inf       | 0.002044 | 1     | 1    | inositol phosphorylation                                               | 0.035 |
| GO:0048002 | 0.0027449 | 28.238    | 0.077667 | 2     | 38   | antigen processing and presentation of peptide antigen                 | 0.035 |
| GO:0046483 | 0.0030615 | 2.451     | 9.401852 | 18    | 4600 | heterocycle metabolic process                                          | 0.035 |
| GO:0006725 | 0.0033522 | 2.427     | 9.477476 | 18    | 4637 | cellular aromatic compound metabolic process                           | 0.035 |
| GO:0009227 | 0.0040837 | 498.417   | 0.004088 | 1     | 2    | nucleotide-sugar catabolic process                                     | 0.035 |
| GO:0036297 | 0.0040837 | 498.417   | 0.004088 | 1     | 2    | interstrand cross-link repair                                          | 0.035 |
| GO:0050713 | 0.0040837 | 498.417   | 0.004088 | 1     | 2    | negative regulation of interleukin-1 beta secretion                    | 0.035 |
| GO:1900242 | 0.0040837 | 498.417   | 0.004088 | 1     | 2    | regulation of synaptic vesicle endocytosis                             | 0.035 |
| GO:1901360 | 0.0050651 | 2.317     | 9.835155 | 18    | 4812 | organic cyclic compound metabolic process                              | 0.035 |
| GO:0006011 | 0.0061194 | 249.198   | 0.006132 | 1     | 3    | UDP-glucose metabolic process                                          | 0.035 |
| GO:0007181 | 0.0061194 | 249.198   | 0.006132 | 1     | 3    | transforming growth factor beta receptor complex assembly              | 0.035 |
| GO:0044546 | 0.0061194 | 249.198   | 0.006132 | 1     | 3    | NLRP3 inflammasome complex assembly                                    | 0.035 |
| GO:0051961 | 0.0061194 | 249.198   | 0.006132 | 1     | 3    | negative regulation of nervous system development                      | 0.035 |
| GO:0051964 | 0.0061194 | 249.198   | 0.006132 | 1     | 3    | negative regulation of synapse assembly                                | 0.035 |
| GO:0060971 | 0.0061194 | 249.198   | 0.006132 | 1     | 3    | embryonic heart tube left/right pattern formation                      | 0.035 |
| GO:0071918 | 0.0061194 | 249.198   | 0.006132 | 1     | 3    | urea transmembrane transport                                           | 0.035 |
| GO:2001135 | 0.0061194 | 249.198   | 0.006132 | 1     | 3    | regulation of endocytic recycling                                      | 0.035 |
| GO:0019882 | 0.0076101 | 16.378    | 0.130808 | 2     | 64   | antigen processing and presentation                                    | 0.038 |

## The number of enriched Reactome pathways:43

| PathwayID | Pathway                                                                                  | N.Selected | N.In.Category | p.value   | p   |
|-----------|------------------------------------------------------------------------------------------|------------|---------------|-----------|-----|
| 4810988   | Mus musculus: Endosomal/Vacuolar pathway                                                 | 2          | 20            | 0.0002012 | 0.0 |
| 4810912   | Mus musculus: HS-GAG biosynthesis                                                        | 2          | 28            | 0.0003770 | 0.0 |
| 4810970   | Mus musculus: Antigen Presentation: Folding, assembly and peptide loading of class I MHC | 2          | 34            | 0.0005440 | 0.0 |
| 4809812   | Mus musculus: Cell Cycle, Mitotic                                                        | 4          | 398           | 0.0005849 | 0.0 |
| 4810913   | Mus musculus: Heparan sulfate/heparin (HS-GAG) metabolism                                | 2          | 48            | 0.0010488 | 0.0 |
| 4809813   | Mus musculus: Cell Cycle                                                                 | 4          | 534           | 0.0017129 | 0.0 |
| 4809857   | Mus musculus: Metabolism of carbohydrates                                                | 3          | 258           | 0.0019840 | 0.0 |
| 4810917   | Mus musculus: Interferon gamma signaling                                                 | 2          | 68            | 0.0020428 | 0.0 |
| 4809815   | Mus musculus: Mitotic M-M/G1 phases                                                      | 3          | 266           | 0.0021613 | 0.0 |
| 4810591   | Mus musculus: Immunoregulatory interactions between a Lymphoid and a non-Lymphoid cell   | 2          | 78            | 0.0026568 | 0.0 |
| 4810985   | Mus musculus: ER-Phagosome pathway                                                       | 2          | 80            | 0.0027888 | 0.0 |
| 4809858   | Mus musculus: Metabolism                                                                 | 6          | 1504          | 0.0029995 | 0.0 |
| 4810016   | Mus musculus: Immune System                                                              | 5          | 1045          | 0.0031610 | 0.0 |
| 4810986   | Mus musculus: Antigen processing-Cross presentation                                      | 2          | 92            | 0.0036439 | 0.0 |
| 4810261   | Mus musculus: Activation of BIM and translocation to mitochondria                        | 1          | 4             | 0.0047290 | 0.0 |
| 4811082   | Mus musculus: Synthesis of IPs in the nucleus                                            | 1          | 4             | 0.0047290 | 0.0 |
| 4810457   | Mus musculus: Glycosaminoglycan metabolism                                               | 2          | 110           | 0.0051259 | 0.0 |
| 4810458   | Mus musculus: MPS IX - Natowicz syndrome                                                 | 2          | 110           | 0.0051259 | 0.0 |
| 4810459   | Mus musculus: Mucopolysaccharidoses                                                      | 2          | 110           | 0.0051259 | 0.0 |
| 4810460   | Mus musculus: MPS IIIB - Sanfilippo syndrome B                                           | 2          | 110           | 0.0051259 | 0.0 |

## Other tests

Let's have a look at the distribution of log<sub>2</sub> fold change of genes in the leaves of the Venn diagram, as compared with that of the heart of the Venn diagram. It is expected that the leaves may have fold change different from the main DEGs.

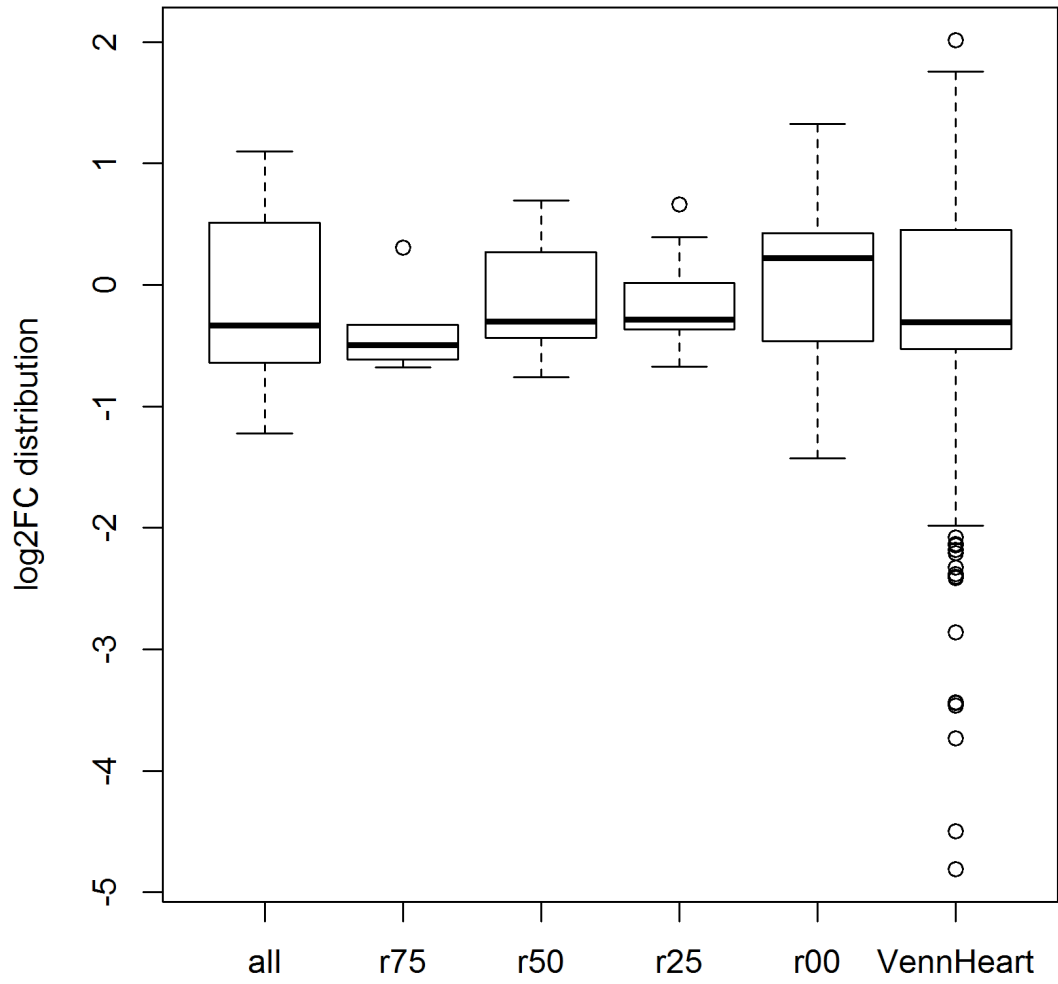

We also check the same for the expression level.

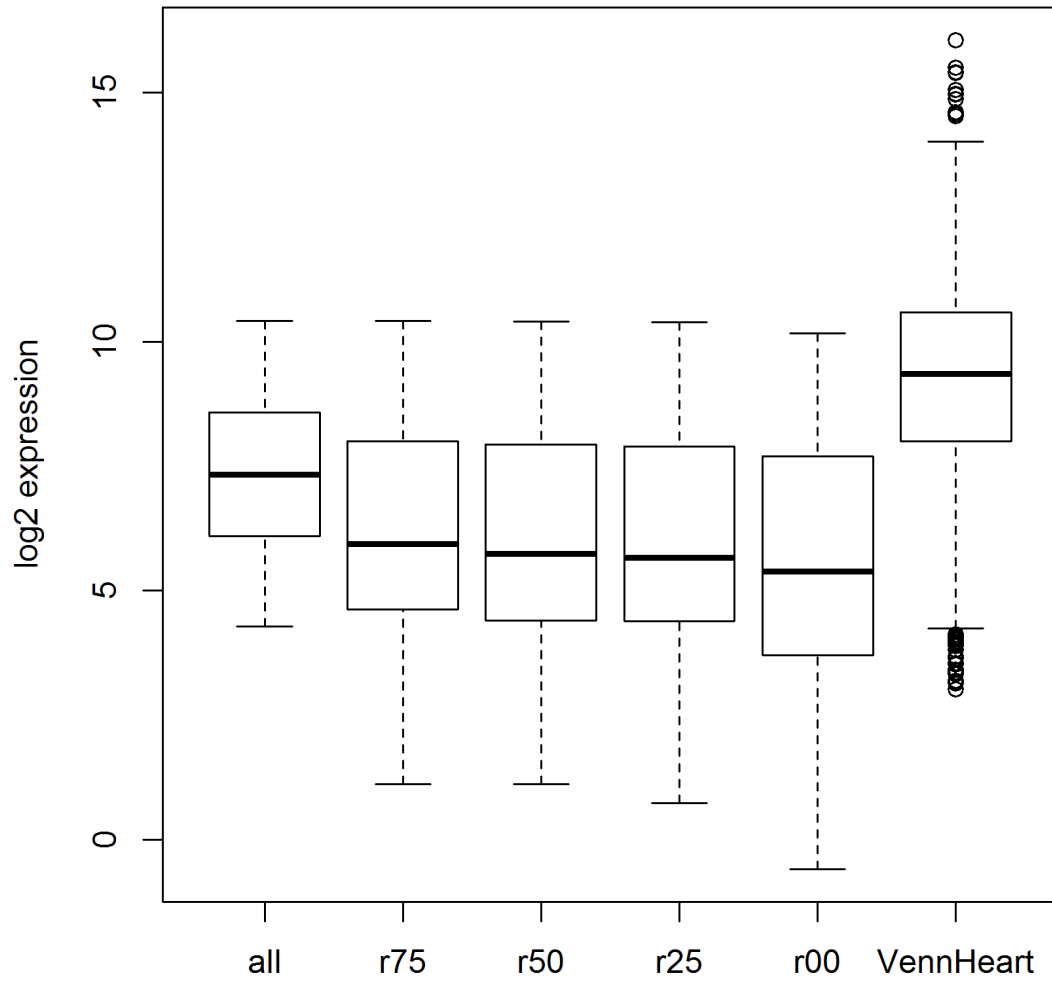

The leaves may have overall lower expression level, hence, more susceptible to the RepeatSoaker.
